# Supplementary material
Source: publisher site journal article supplement (https://www.dovepress.com/article/352731)
Supplement: Supplementary file 1 [file get_supplementary_file.php]

**Supplemental Table 1. Spearman’s correlation between choroid parameter and length of illness, antipsychotic treatment.**

| <b>Correlation</b>                                                                                  | <b>R-value</b> | <b>p-value</b> |
|-----------------------------------------------------------------------------------------------------|----------------|----------------|
| Maximum CT ( $\mu\text{m}$ ) and Duration of Illness (months)                                       | -0.06          | .65            |
| Maximum CT ( $\mu\text{m}$ ) and Antipsychotic Exposure (in Chlorpromazine Dosage Equivalents (mg)) | -0.16          | .27            |
| CVD (%) and Duration of Illness (months)                                                            | -0.16          | .24            |
| CVD (%) and Chlorpromazine Dosage (mg)                                                              | 0.10           | .50            |
| Total CVV ( $\text{mm}^3$ ) and Duration of Illness (months)                                        | -0.09          | .52            |
| Total CVV ( $\text{mm}^3$ ) and Antipsychotic Exposure (in Chlorpromazine Dosage Equivalents (mg))  | -0.16          | .29            |
